# Supplementary material for: Spray-coated few-layer graphene as an aluminium battery cathode
Source: Royal Society of Chemistry journal article supplement (doi:10.1039/d2se00532h), 2022-01-01

## Spray Coated Few-Layer Graphene as Aluminium Battery Cathode

*Shaikshavali Petnikota<sup>1,2,\*</sup>, Daniel Koch<sup>3</sup>, Muhammad Imran<sup>4</sup>, Joka Buha<sup>4</sup>, Jaya Kumar Panda<sup>1,2</sup>, Mohammad Akbari Garakani<sup>1,2</sup>, Luigi Marasco<sup>2</sup>, Andrea Gamucci<sup>1</sup>, Francesco Bonaccorso<sup>1,2,γ</sup> and Vittorio Pellegrini<sup>1,2,†</sup>*

<sup>1</sup>BeDimensional Spa, Via Lungotorrente Secca 3D, 16163 Genova, Italy

<sup>2</sup>Graphene Labs, Istituto Italiano di Tecnologia, Via Morego 30, 16163 Genova, Italy

<sup>3</sup>Department of Mechanical Engineering, National University of Singapore, 9 Engineering Drive 1, Block EA #03-06, Singapore 117575, Singapore

<sup>4</sup>Nanochemistry Department, Istituto Italiano di Tecnologia, Via Morego 30, 16163 Genova, Italy

## Supporting Information

---

\*Corresponding author. E-mail address: [psvali85@gmail.com](mailto:psvali85@gmail.com); [s.petnikota@bedimensional.it](mailto:s.petnikota@bedimensional.it)

γCorresponding author. Tel: +39 010 2364 170; [f.bonaccorso@bedimensional.it](mailto:f.bonaccorso@bedimensional.it)

†Corresponding author. Tel: +39 010 2364 170; E-mail address: [v.pellegrini@bedimensional.it](mailto:v.pellegrini@bedimensional.it)

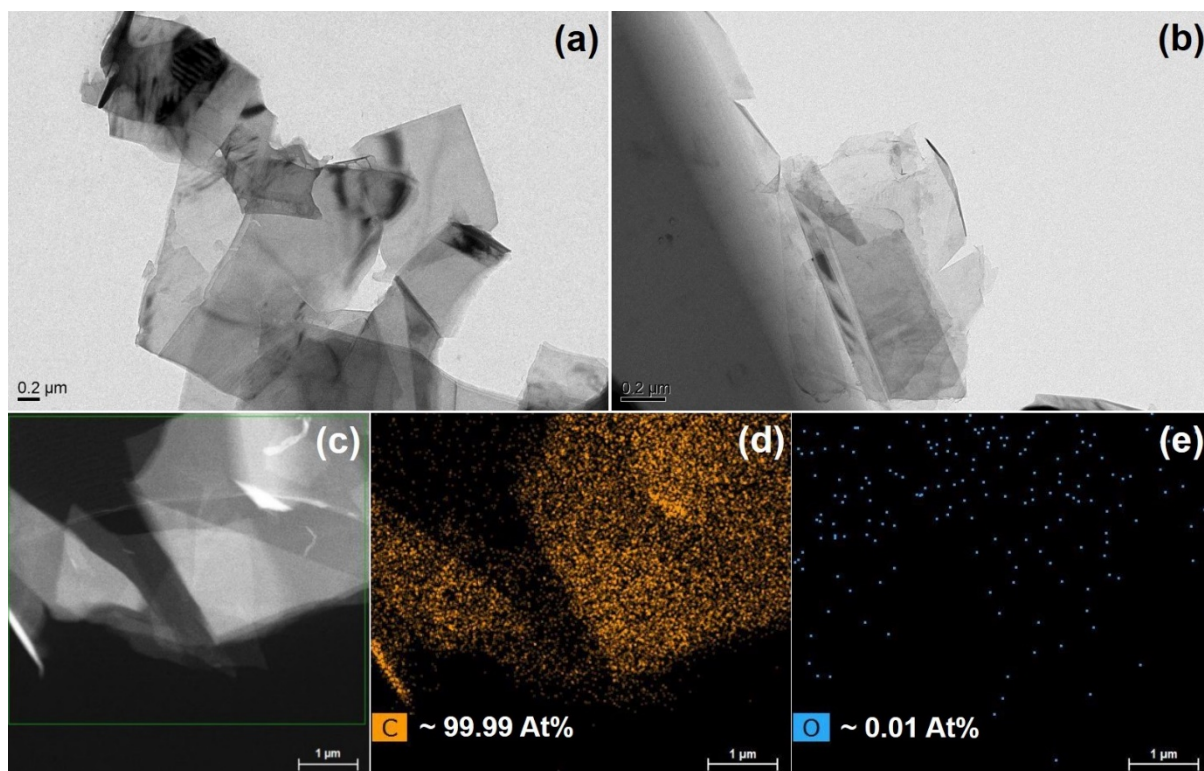

Figure S1. TEM images of GWJM: a) rectangular FLG sheets, b) edge features of a FLG sheet and c-e) elemental composition analysis of a FLG sheet.

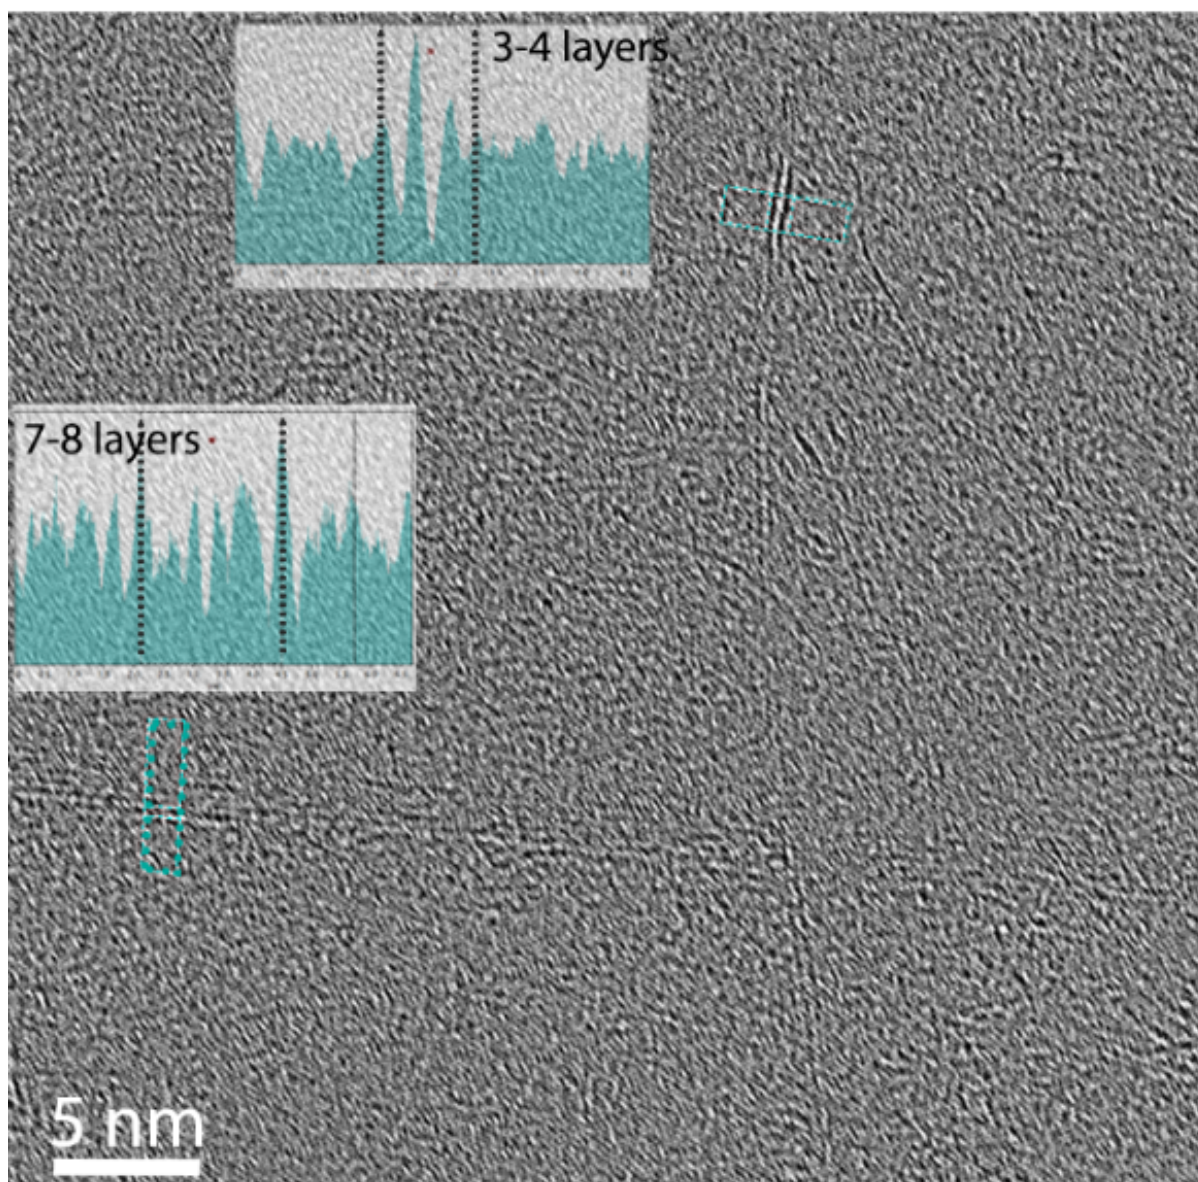

Figure S2. HRTEM image of an FLG sheets. The lines visible at the fold correspond to individual C layers within flake (graphite) spaced at about  $> 0.34$  nm along the c-axis. Based on the intensity profiles across the folds (insets in the image) the two flakes were 3-4 and 7-8 monolayers thick.

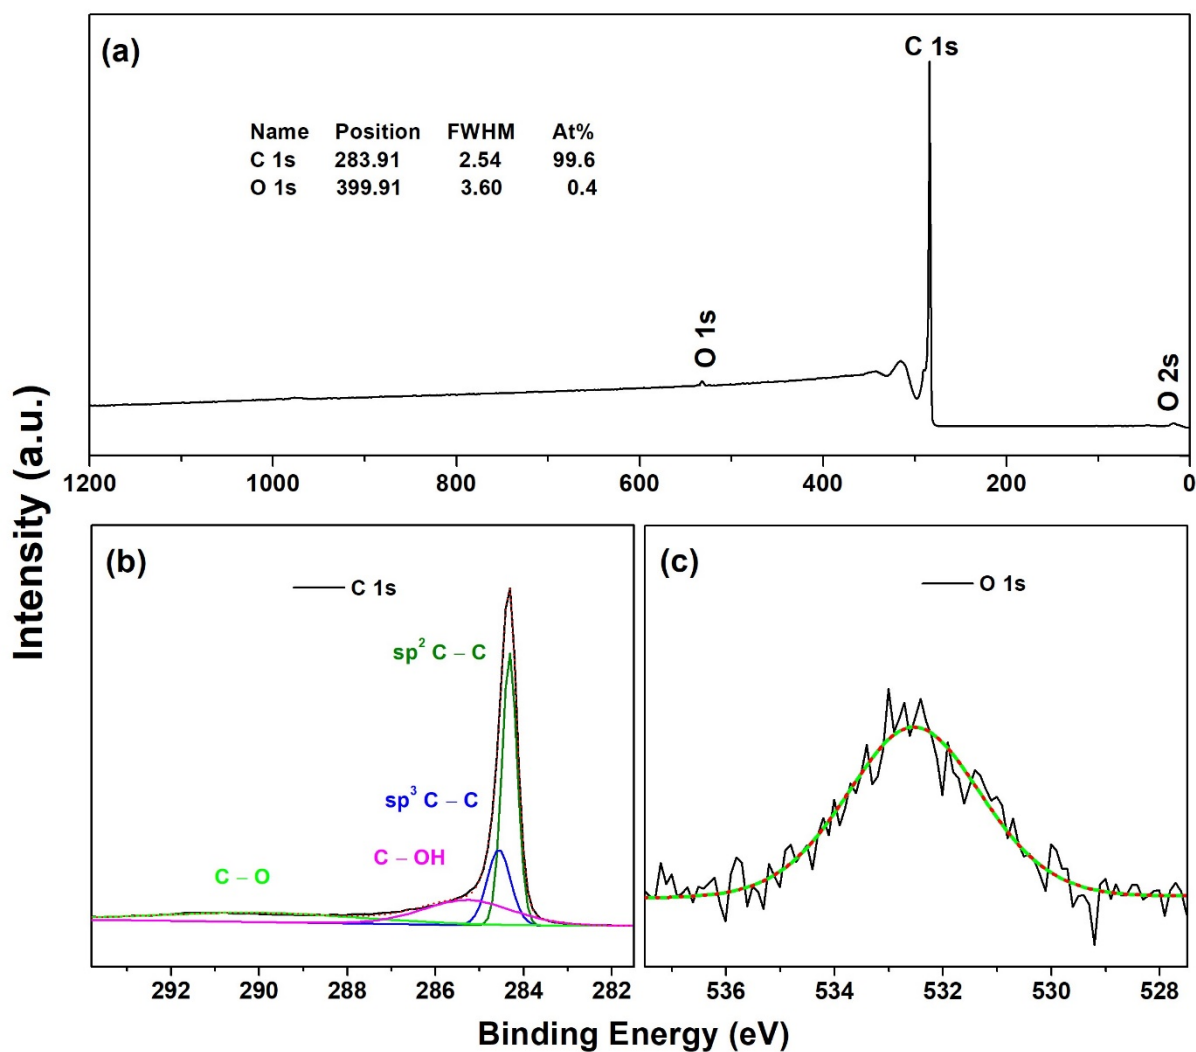

Figure S3. a) XPS survey spectrum and corresponding high resolution b) C 1s and c) O 1s spectra of GWJM.

**Table 1.** XPS analysis of GWJM.

| Name        | Bonding Mode   | Position (eV) | FWHM* (eV) | At%    |
|-------------|----------------|---------------|------------|--------|
| <b>C 1s</b> | C = C          | 284.32        | 0.40       | 40.56  |
|             | C – C          | 284.56        | 0.62       | 17.53  |
|             | C – OH         | 285.27        | 2.42       | 22.58  |
|             | C – O          | 289.97        | 5.61       | 19.33  |
| <b>O 1s</b> | C – OH / C – O | 532.54        | 2.91       | 100.00 |

\* FWHM - full width at half maximum

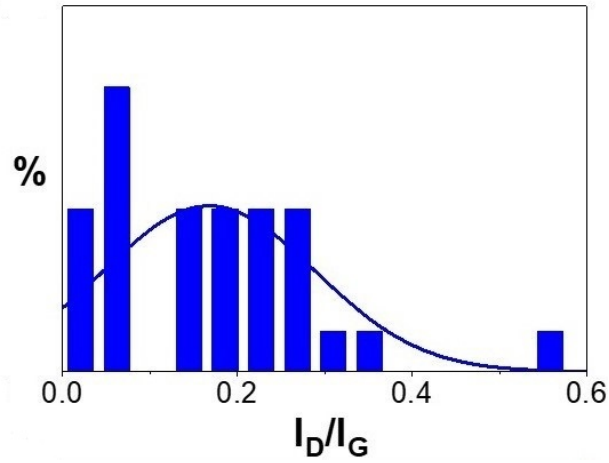

Figure S4. Raman statistical analysis of GWJM.

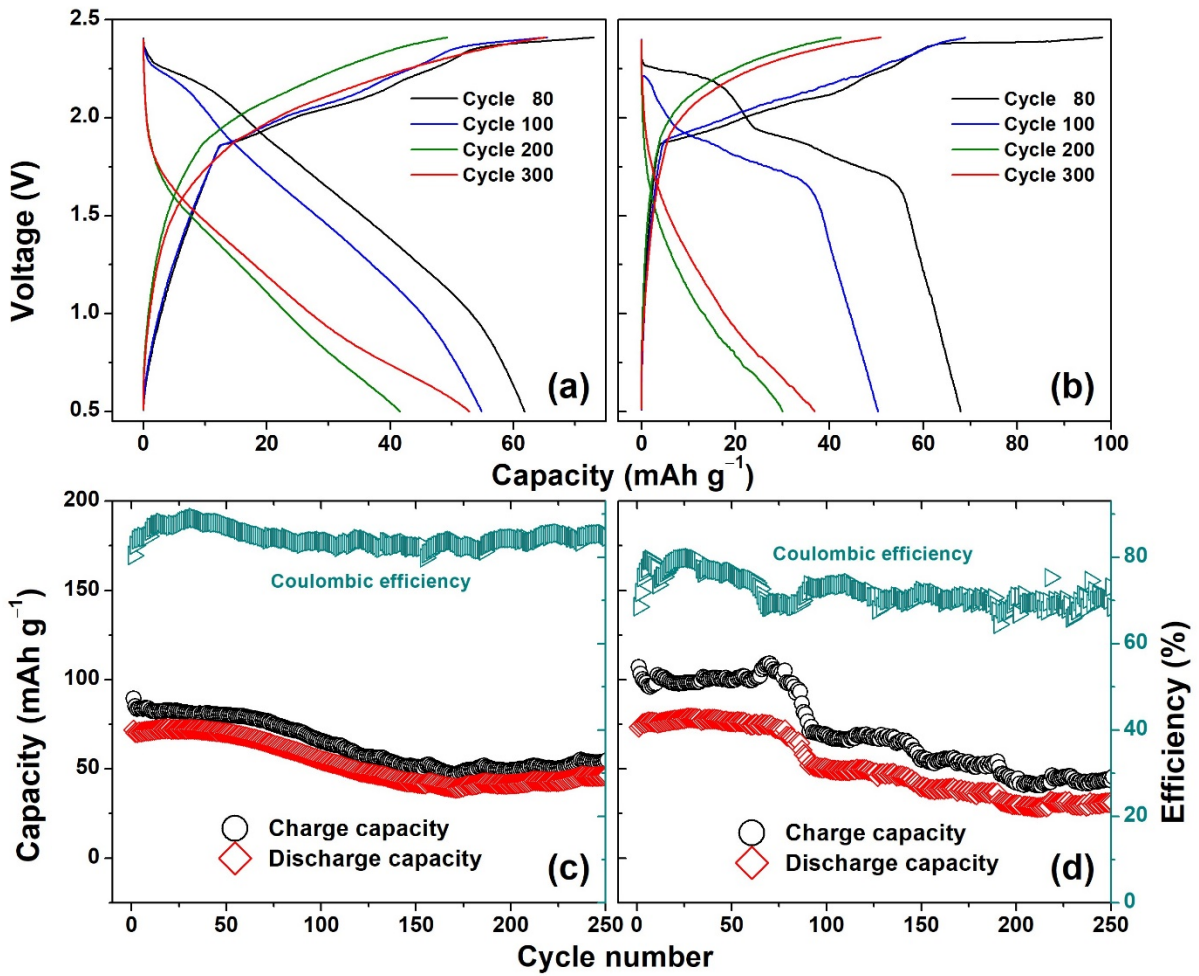

Figure S5. Charge-discharge profiles of a) GWJM, b) graphite, cyclic performance of c)

GWJM and d) graphite.

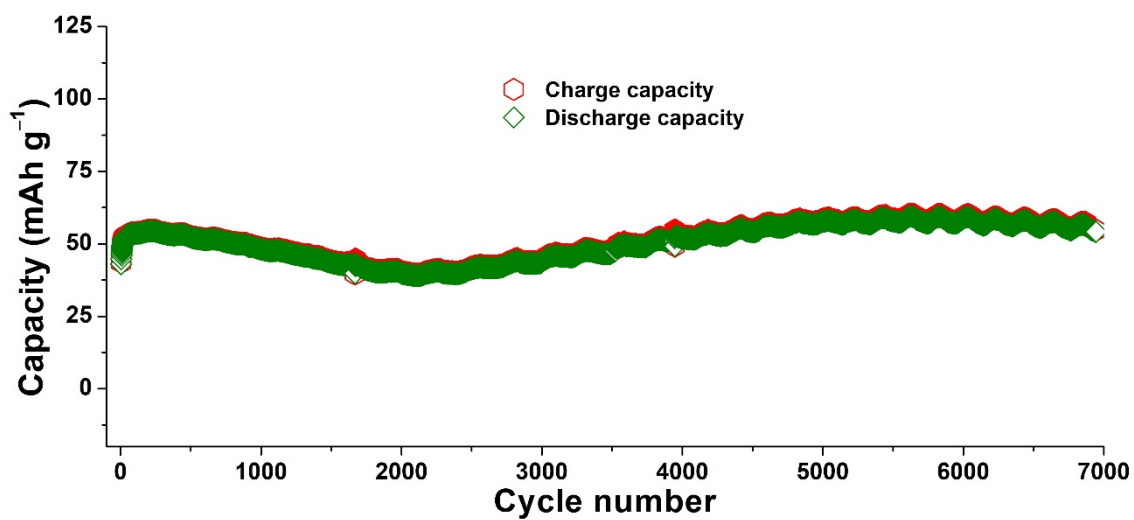

Figure S6. Long-term cyclability of 100 wt.% GWJM electrode at  $1 \text{ A g}^{-1}$  current rate.

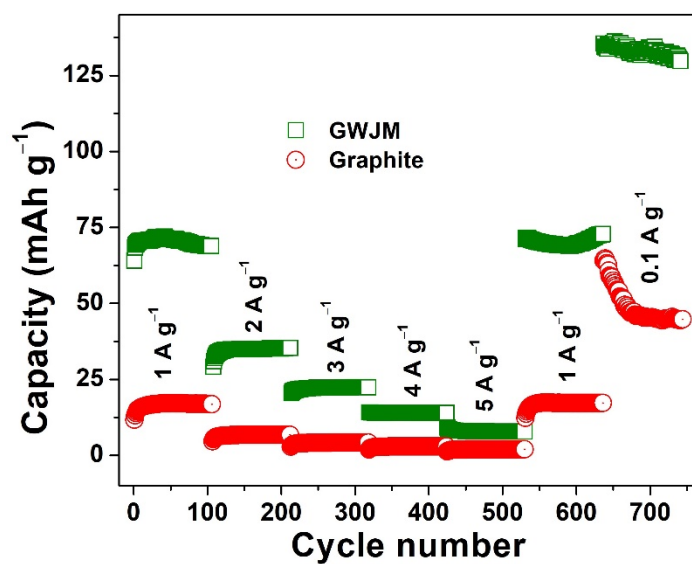

Figure S7. Rate capability of the graphite in comparison to GWJM.

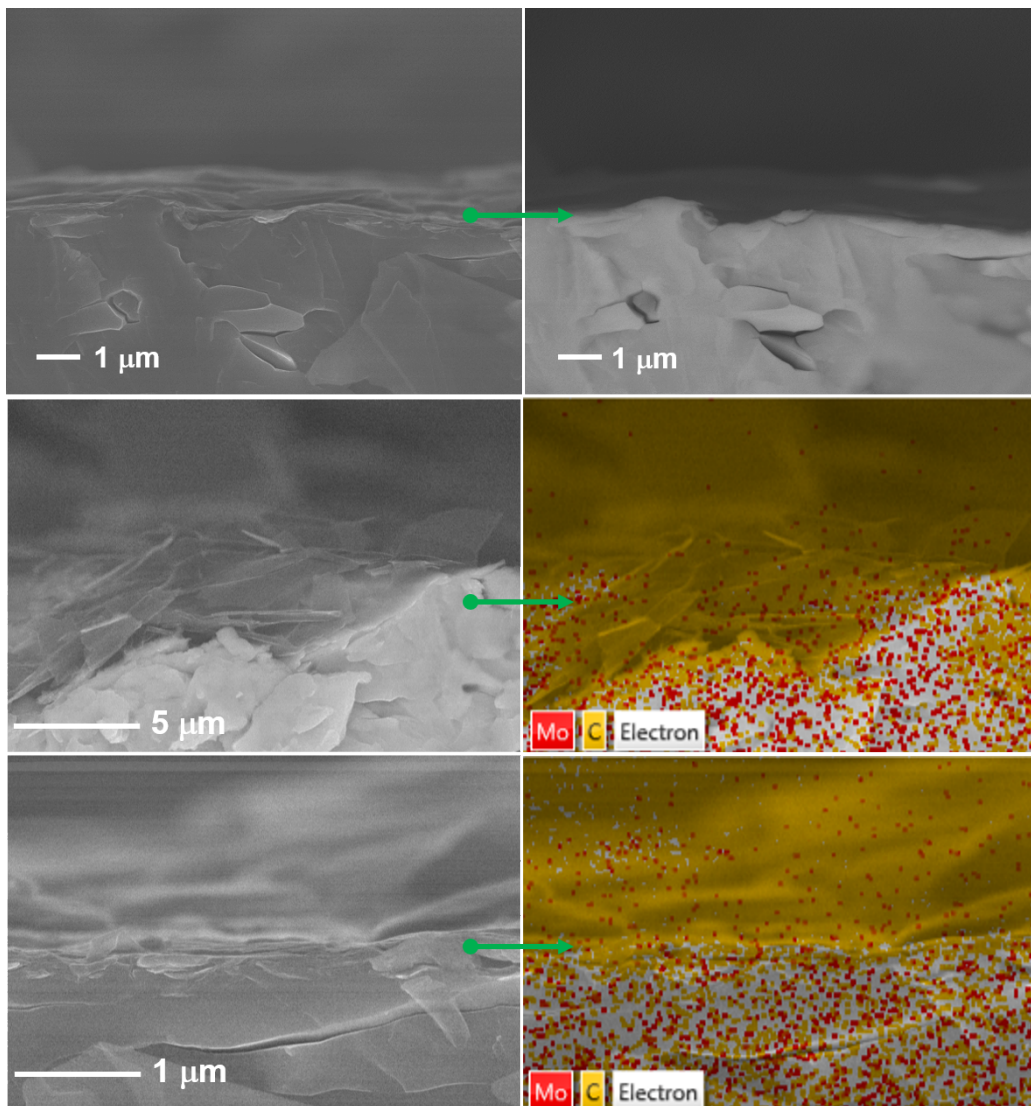

Figure S8. SEM cross-section view of spray-coated GWJM electrodes and corresponding elemental mapping. The thickness of the GWJM coating found in-between 1 – 5 μm.

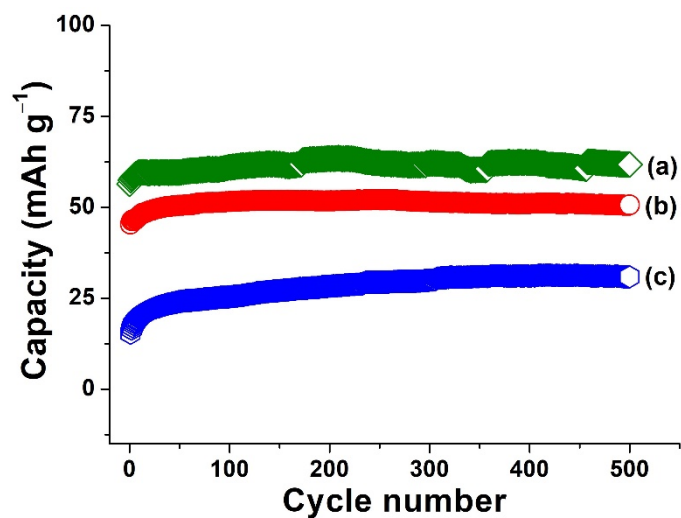

Figure S9. Charge capacity vs. mass ( $m$ ) loading of GWJM at (a)  $m \leq 2.0 \text{ mg cm}^{-2}$ , (b)  $3.0 < m < 5.0 \text{ mg cm}^{-2}$  and (c)  $m > 5.0 \text{ mg cm}^{-2}$  at  $1.0 \text{ A g}^{-1}$  current rate.

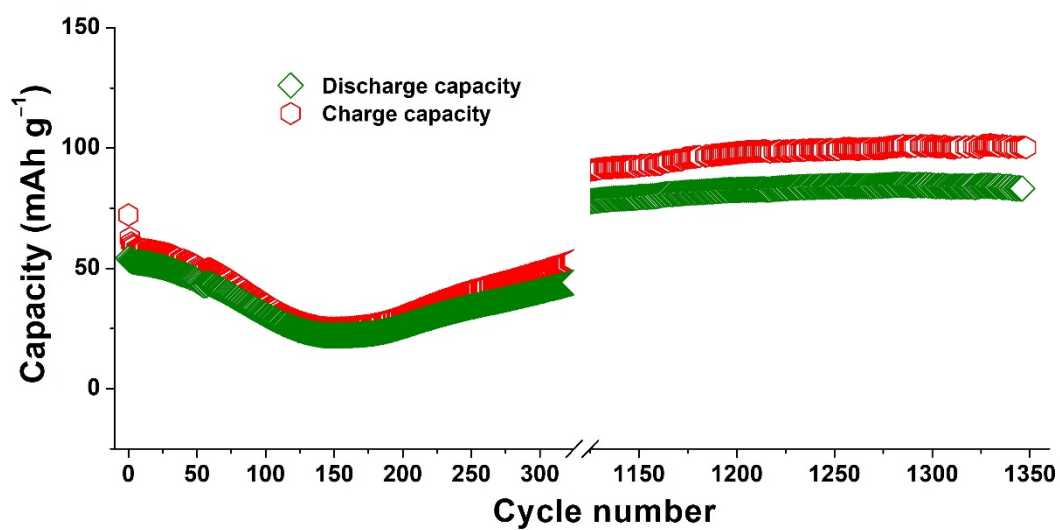

Figure S10. Cycling performance of GWJM at  $70 \text{ }^\circ\text{C}$  and  $1.0 \text{ A g}^{-1}$  current rate.



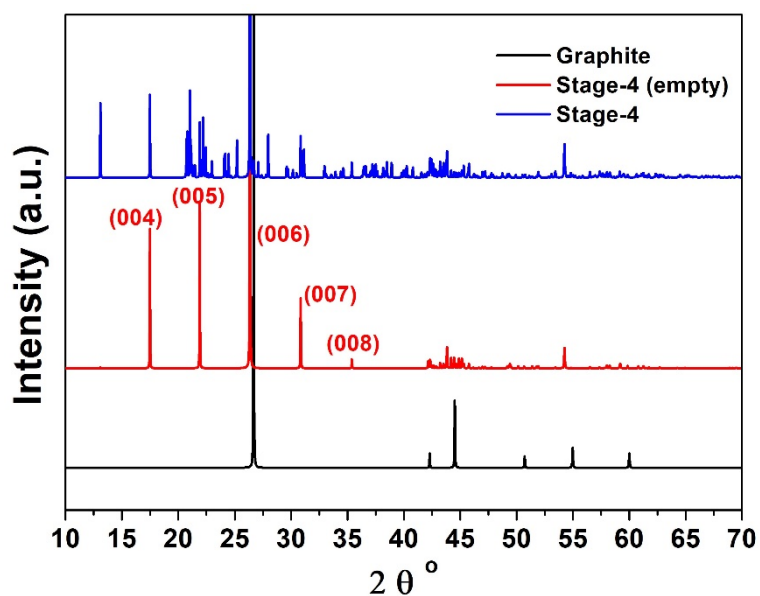

Figure S11. Theoretical XRD spectra of pristine (black) and stage-4 chloroaluminate-inserted graphite with (blue) and without (red) the inserted  $\text{AlCl}_4^-$  anions, but no additional structure relaxation. The crystal planes corresponding to the reflections of the “empty” stage-4 graphite are indicated next to the respective peaks.

Table S2. Theoretical capacity and corresponding stages of chloroaluminate-inserted graphite.

| Capacity ( $\text{mAh g}^{-1}$ ) | n(Al) | n(C)      | stage    |
|----------------------------------|-------|-----------|----------|
| 9                                | 1     | 247.94078 | 30.9926  |
| 14                               | 1     | 159.3905  | 19.92381 |
| 22                               | 1     | 101.43032 | 12.67879 |
| 35                               | 1     | 63.7562   | 7.96953  |
| 72                               | 1     | 30.9926   | 3.87407  |
| 93                               | 1     | 23.99427  | 2.99928  |
| 135                              | 1     | 16.52939  | 2.06617  |

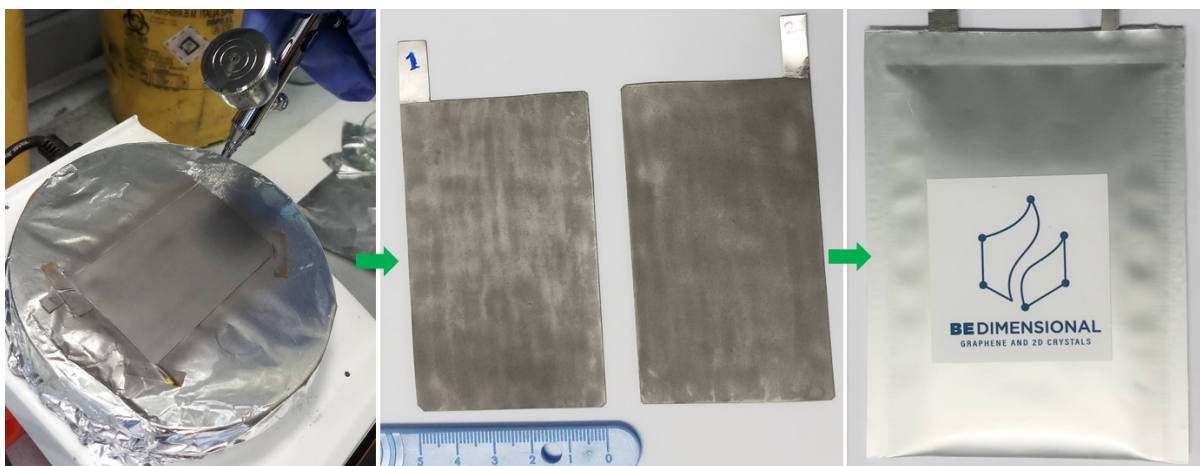

Figure S12. Spray-coting of GWJM electrodes ( $8.5 \times 5.0 \text{ cm}^2$ ) which are used to fabricate a 5 Ah battery pack. The battery pack is used to light an LED as shown below.

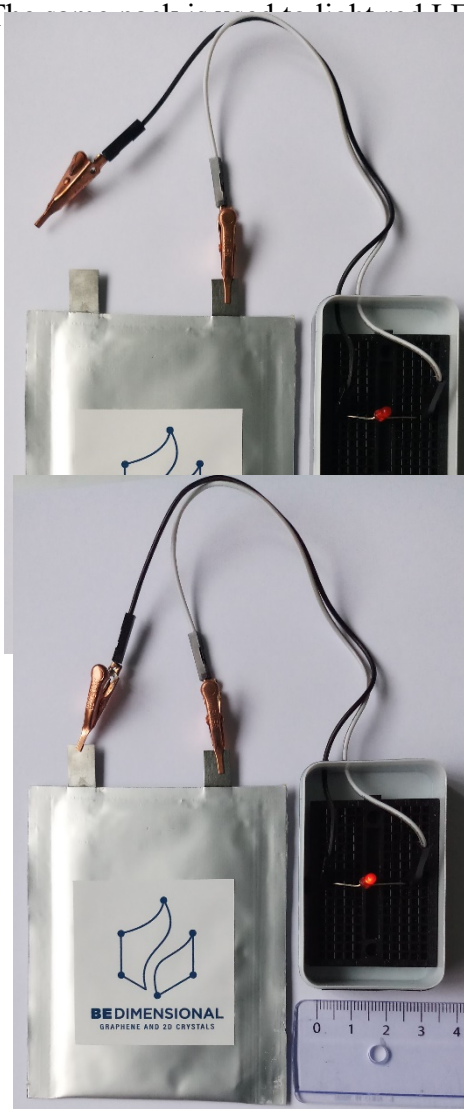

Supplement: d2se00532h1.pdf [file d2se00532h1.pdf]
